# Supplementary material for: Changes to the chemical state of the Northern Hemisphere atmosphere during the second half of the twentieth century
Source: Copernicus journal article supplement (doi:10.5194/acp-17-8269-2017), 2017-07-07
Supplement: Supplementary file 1 [file acp-17-8269-2017-supplement.zip]

Archive with 3 entries (3 files):
- acp-17-8269-2017-supplement-title-page.pdf
- Supplement.pdf
- Supplement.xlsx
