# Supplementary material for: Changes to the chemical state of the Northern Hemisphere atmosphere during the second half of the twentieth century
Source: Copernicus journal article supplement (doi:10.5194/acp-17-8269-2017), 2017-07-07
Supplement: Supplementary file 1 [file acp-17-8269-2017-supplement.zip › acp-17-8269-2017-supplement-title-page.pdf]

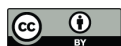

*Supplement of*

**Changes to the chemical state of the Northern Hemisphere atmosphere during the second half of the twentieth century**

**Mike J. Newland et al.**

*Correspondence to:* Mike J. Newland ([mike.newland@york.ac.uk](mailto:mike.newland@york.ac.uk))

- [acp-17-8269-2017-supplement-title-page.pdf](#)
- [Supplement.pdf](#)
- [Supplement.xlsx](#)

The copyright of individual parts of the supplement might differ from the CC BY 3.0 License.
