# Supplementary material for: Changes to the chemical state of the Northern Hemisphere atmosphere during the second half of the twentieth century
Source: Copernicus journal article supplement (doi:10.5194/acp-17-8269-2017), 2017-07-07
Supplement: Supplementary file 1 [file Supplement.xlsx]

## Sheet: Firn measurements - Figure 2
Depth	2-butyl nitrate		2+3-pentyl nitrate		3-methyl-2-butyl nitrate
	Meas.	Err.	Meas.	Err.	Meas.	Err.
34.72	4.71595	0.664134	4.78961	0.221875	1.07	0.12
42.42	6.70592	0.603774	6.60722	0.355409	1.35	0.14
50	6.99665	0.733188	8.07829	0.303579	1.39	0.13
54.9	7.63102	0.352757	10.6349	0.529998	1.99	0.16
57.4	8.21815	1.03785	9.27367	0.384356	1.77	0.24
59.9	8.46619	0.457622	7.80562	0.277134	1.62	0.18
61.95	8.40944	0.476202	9.81536	0.610397	2.06	0.26
63.85	7.81076	0.427351	6.24208	0.596821	1.39	0.27
65.75	7.75997	0.722149	7.47411	0.410699	1.4	0.15
68.05	5.08039	0.736026	3.82924	0.395185	0.73	0.14
70.05	4.22213	0.350675	2.60957	0.306248	0.47	0.11
72	3.38963	0.274198	1.7856	0.183901	0.41	0.08
74.08	2.9438	0.293675	1.83645	0.2154	0.27	0.08
75.9	2.67869	0.273268	1.43303	0.203374	0.25	0.07
77.75	2.62403	0.236073	1.58213	0.202306	0.39	0.14

## Sheet: Firn Model Output - Figure 2
Date	2-butyl nitrate			2+3-pentyl nitrate			3-methyl-2-butyl nitrate
	Best estimate	+ve Error	-ve Error	Best estimate	+ve Error	-ve Error	Best estimate	+ve Error	-ve Error
1950.04	2.96562	3.66281	2.26843	1.12592	3.27535	-1.0235	0.184625	0.539332	-0.170083
1950.12	2.96697	3.66411	2.26983	1.12545	3.27467	-1.02377	0.184833	0.539579	-0.169913
1950.21	2.96833	3.66542	2.27123	1.12502	3.27404	-1.02399	0.185047	0.539832	-0.169737
1950.29	2.96969	3.66674	2.27263	1.12464	3.27346	-1.02419	0.185268	0.540091	-0.169555
1950.37	2.97106	3.66807	2.27404	1.1243	3.27294	-1.02434	0.185495	0.540357	-0.169366
1950.46	2.97243	3.66941	2.27545	1.124	3.27247	-1.02446	0.185729	0.540629	-0.169171
1950.54	2.97382	3.67076	2.27687	1.12376	3.27205	-1.02454	0.185969	0.540908	-0.16897
1950.62	2.97521	3.67212	2.27829	1.12355	3.27168	-1.02458	0.186216	0.541194	-0.168762
1950.71	2.97661	3.67349	2.27972	1.1234	3.27138	-1.02458	0.186469	0.541487	-0.168548
1950.79	2.97801	3.67487	2.28116	1.12329	3.27112	-1.02454	0.186729	0.541786	-0.168328
1950.87	2.97943	3.67626	2.2826	1.12323	3.27093	-1.02447	0.186996	0.542092	-0.1681
1950.96	2.98085	3.67766	2.28404	1.12322	3.27079	-1.02435	0.187269	0.542404	-0.167866
1951.04	2.98229	3.67908	2.28549	1.12326	3.27071	-1.02419	0.18755	0.542724	-0.167625
1951.12	2.98373	3.68051	2.28695	1.12335	3.27069	-1.02399	0.187837	0.543051	-0.167377
1951.21	2.98518	3.68194	2.28841	1.12348	3.27072	-1.02375	0.188131	0.543385	-0.167123
1951.29	2.98664	3.6834	2.28988	1.12367	3.27082	-1.02347	0.188432	0.543726	-0.166861
1951.37	2.98811	3.68486	2.29136	1.12391	3.27097	-1.02314	0.188741	0.544074	-0.166592
1951.46	2.98959	3.68634	2.29284	1.12421	3.27119	-1.02277	0.189056	0.544429	-0.166316
1951.54	2.99108	3.68783	2.29433	1.12455	3.27147	-1.02236	0.189379	0.544792	-0.166033
1951.62	2.99258	3.68933	2.29583	1.12495	3.27181	-1.02191	0.189709	0.545162	-0.165743
1951.71	2.99409	3.69085	2.29733	1.1254	3.27221	-1.0214	0.190047	0.54554	-0.165446
1951.79	2.99562	3.69239	2.29885	1.12591	3.27267	-1.02086	0.190392	0.545925	-0.16514
1951.87	2.99715	3.69394	2.30037	1.12647	3.2732	-1.02027	0.190745	0.546317	-0.164828
1951.96	2.9987	3.69551	2.30189	1.12708	3.27379	-1.01963	0.191105	0.546717	-0.164508
1952.04	3.00026	3.69709	2.30343	1.12776	3.27445	-1.01894	0.191473	0.547126	-0.16418
1952.12	3.00183	3.69869	2.30497	1.12848	3.27518	-1.01821	0.191848	0.547541	-0.163845
1952.21	3.00341	3.7003	2.30653	1.12927	3.27597	-1.01743	0.192232	0.547965	-0.163501
1952.29	3.00501	3.70194	2.30809	1.13011	3.27682	-1.0166	0.192623	0.548397	-0.16315
1952.37	3.00662	3.70359	2.30966	1.13101	3.27775	-1.01572	0.193023	0.548836	-0.162791
1952.46	3.00825	3.70526	2.31124	1.13197	3.27874	-1.0148	0.19343	0.549284	-0.162424
1952.54	3.00988	3.70694	2.31282	1.13299	3.2798	-1.01382	0.193846	0.54974	-0.162049
1952.62	3.01154	3.70865	2.31442	1.13407	3.28093	-1.01279	0.194269	0.550204	-0.161665
1952.71	3.0132	3.71038	2.31603	1.13521	3.28213	-1.01171	0.194702	0.550677	-0.161273
1952.79	3.01488	3.71212	2.31765	1.13641	3.2834	-1.01058	0.195142	0.551158	-0.160873
1952.87	3.01658	3.71389	2.31927	1.13767	3.28475	-1.0094	0.195591	0.551647	-0.160465
1952.96	3.01829	3.71568	2.32091	1.139	3.28616	-1.00816	0.196048	0.552145	-0.160048
1953.04	3.02002	3.71748	2.32256	1.14039	3.28764	-1.00687	0.196515	0.552652	-0.159622
1953.12	3.02177	3.71932	2.32422	1.14184	3.2892	-1.00553	0.196989	0.553167	-0.159188
1953.21	3.02353	3.72117	2.32589	1.14335	3.29083	-1.00413	0.197473	0.553691	-0.158745
1953.29	3.02531	3.72304	2.32757	1.14493	3.29254	-1.00268	0.197966	0.554224	-0.158293
1953.37	3.0271	3.72494	2.32926	1.14658	3.29432	-1.00117	0.198467	0.554766	-0.157832
1953.46	3.02891	3.72686	2.33096	1.14829	3.29618	-0.999603	0.198977	0.555317	-0.157362
1953.54	3.03074	3.72881	2.33268	1.15006	3.29811	-0.997981	0.199497	0.555878	-0.156883
1953.62	3.03259	3.73078	2.3344	1.15191	3.30011	-0.9963	0.200026	0.556447	-0.156395
1953.71	3.03446	3.73278	2.33614	1.15382	3.3022	-0.994562	0.200564	0.557026	-0.155898
1953.79	3.03635	3.7348	2.33789	1.1558	3.30436	-0.992764	0.201112	0.557615	-0.155391
1953.87	3.03825	3.73685	2.33966	1.15785	3.3066	-0.990907	0.201669	0.558212	-0.154875
1953.96	3.04018	3.73892	2.34143	1.15996	3.30892	-0.98899	0.202236	0.55882	-0.154349
1954.04	3.04213	3.74103	2.34322	1.16215	3.31131	-0.987012	0.202812	0.559437	-0.153813
1954.12	3.04409	3.74316	2.34503	1.16441	3.31379	-0.984973	0.203398	0.560064	-0.153268
1954.21	3.04608	3.74532	2.34685	1.16674	3.31635	-0.982872	0.203994	0.560701	-0.152713
1954.29	3.04809	3.7475	2.34868	1.16914	3.31899	-0.980708	0.2046	0.561348	-0.152148
1954.37	3.05012	3.74972	2.35052	1.17161	3.32171	-0.978481	0.205216	0.562005	-0.151573
1954.46	3.05217	3.75197	2.35238	1.17416	3.32451	-0.976189	0.205842	0.562672	-0.150988
1954.54	3.05425	3.75424	2.35425	1.17678	3.32739	-0.973834	0.206479	0.56335	-0.150392
1954.62	3.05635	3.75655	2.35614	1.17947	3.33036	-0.971413	0.207126	0.564038	-0.149786
1954.71	3.05847	3.75889	2.35805	1.18224	3.33341	-0.968926	0.207783	0.564736	-0.14917
1954.79	3.06062	3.76127	2.35996	1.18509	3.33654	-0.966373	0.208451	0.565445	-0.148544
1954.87	3.06279	3.76367	2.3619	1.18801	3.33976	-0.963753	0.209129	0.566165	-0.147906
1954.96	3.06498	3.76611	2.36385	1.191	3.34307	-0.961064	0.209818	0.566896	-0.147259
1955.04	3.0672	3.76858	2.36582	1.19408	3.34646	-0.958308	0.210519	0.567637	-0.1466
1955.12	3.06945	3.77109	2.3678	1.19723	3.34994	-0.955482	0.21123	0.568389	-0.14593
1955.21	3.07172	3.77363	2.3698	1.20046	3.3535	-0.952586	0.211952	0.569153	-0.14525
1955.29	3.07401	3.77621	2.37181	1.20376	3.35715	-0.94962	0.212685	0.569928	-0.144558
1955.37	3.07634	3.77883	2.37385	1.20715	3.36089	-0.946582	0.21343	0.570714	-0.143855
1955.46	3.07869	3.78148	2.3759	1.21062	3.36471	-0.943473	0.214186	0.571512	-0.143141
1955.54	3.08107	3.78417	2.37797	1.21417	3.36863	-0.940291	0.214953	0.572321	-0.142415
1955.62	3.08348	3.7869	2.38005	1.2178	3.37264	-0.937036	0.215732	0.573142	-0.141678
1955.71	3.08591	3.78966	2.38216	1.22151	3.37673	-0.933707	0.216523	0.573974	-0.140929
1955.79	3.08838	3.79247	2.38428	1.22531	3.38092	-0.930304	0.217325	0.574819	-0.140169
1955.87	3.09087	3.79532	2.38643	1.22918	3.38519	-0.926825	0.21814	0.575676	-0.139396
1955.96	3.0934	3.7982	2.38859	1.23315	3.38956	-0.92327	0.218966	0.576544	-0.138612
1956.04	3.09595	3.80113	2.39077	1.23719	3.39402	-0.919639	0.219805	0.577425	-0.137816
1956.12	3.09854	3.8041	2.39297	1.24132	3.39857	-0.915931	0.220656	0.578319	-0.137007
1956.21	3.10115	3.80712	2.39519	1.24554	3.40322	-0.912144	0.221519	0.579224	-0.136187
1956.29	3.1038	3.81017	2.39743	1.24984	3.40796	-0.908279	0.222394	0.580143	-0.135354
1956.37	3.10648	3.81327	2.3997	1.25423	3.41279	-0.904334	0.223283	0.581074	-0.134508
1956.46	3.1092	3.81642	2.40198	1.2587	3.41772	-0.900309	0.224184	0.582018	-0.13365
1956.54	3.11195	3.81961	2.40429	1.26327	3.42274	-0.896203	0.225098	0.582975	-0.132779
1956.62	3.11473	3.82284	2.40661	1.26792	3.42786	-0.892016	0.226024	0.583944	-0.131896
1956.71	3.11754	3.82612	2.40896	1.27266	3.43307	-0.887747	0.226964	0.584928	-0.130999
1956.79	3.12039	3.82945	2.41133	1.27749	3.43838	-0.883395	0.227917	0.585924	-0.13009
1956.87	3.12328	3.83283	2.41373	1.28241	3.44378	-0.878959	0.228883	0.586934	-0.129167
1956.96	3.1262	3.83626	2.41615	1.28742	3.44929	-0.874439	0.229863	0.587957	-0.128231
1957.04	3.12916	3.83973	2.41859	1.29253	3.45489	-0.869834	0.230856	0.588994	-0.127282
1957.12	3.13216	3.84326	2.42105	1.29772	3.46059	-0.865143	0.231863	0.590045	-0.126319
1957.21	3.13519	3.84683	2.42354	1.30301	3.46639	-0.860366	0.232884	0.59111	-0.125343
1957.29	3.13826	3.85046	2.42606	1.30839	3.47228	-0.855501	0.233918	0.592189	-0.124353
1957.37	3.14137	3.85414	2.4286	1.31386	3.47828	-0.850549	0.234967	0.593282	-0.123349
1957.46	3.14452	3.85787	2.43116	1.31943	3.48437	-0.845509	0.236029	0.594389	-0.122331
1957.54	3.1477	3.86165	2.43375	1.3251	3.49057	-0.840379	0.237106	0.595511	-0.121299
1957.62	3.15093	3.86549	2.43637	1.33086	3.49687	-0.835159	0.238197	0.596648	-0.120253
1957.71	3.1542	3.86938	2.43901	1.33671	3.50327	-0.829849	0.239303	0.597799	-0.119192
1957.79	3.15751	3.87333	2.44168	1.34266	3.50977	-0.824447	0.240424	0.598964	-0.118117
1957.87	3.16086	3.87733	2.44438	1.34871	3.51637	-0.818953	0.241559	0.600145	-0.117028
1957.96	3.16425	3.88139	2.44711	1.35485	3.52308	-0.813367	0.242709	0.601341	-0.115924
1958.04	3.16769	3.88551	2.44986	1.3611	3.52988	-0.807687	0.243874	0.602552	-0.114805
1958.12	3.17117	3.88969	2.45264	1.36744	3.5368	-0.801913	0.245054	0.603779	-0.113671
1958.21	3.17469	3.89392	2.45546	1.37388	3.54381	-0.796045	0.246249	0.605021	-0.112523
1958.29	3.17826	3.89821	2.4583	1.38043	3.55093	-0.790081	0.24746	0.606278	-0.111359
1958.37	3.18187	3.90256	2.46117	1.38707	3.55816	-0.78402	0.248686	0.607551	-0.110179
1958.46	3.18553	3.90698	2.46407	1.39381	3.56549	-0.777863	0.249928	0.60884	-0.108985
1958.54	3.18923	3.91145	2.46701	1.40066	3.57292	-0.771608	0.251185	0.610145	-0.107775
1958.62	3.19298	3.91599	2.46997	1.4076	3.58046	-0.765255	0.252459	0.611467	-0.106549
1958.71	3.19678	3.92059	2.47297	1.41465	3.58811	-0.758803	0.253748	0.612804	-0.105307
1958.79	3.20062	3.92525	2.476	1.42181	3.59586	-0.752252	0.255054	0.614158	-0.10405
1958.87	3.20452	3.92998	2.47906	1.42906	3.60372	-0.7456	0.256376	0.615528	-0.102776
1958.96	3.20846	3.93477	2.48216	1.43642	3.61169	-0.738848	0.257714	0.616915	-0.101487
1959.04	3.21245	3.93962	2.48528	1.44389	3.61977	-0.731993	0.259069	0.618319	-0.100181
1959.12	3.2165	3.94455	2.48845	1.45146	3.62795	-0.725037	0.260441	0.61974	-0.0989
1959.21	3.22059	3.94953	2.49165	1.45914	3.63625	-0.717977	0.261829	0.621178	-0.0975
1959.29	3.22474	3.95459	2.49488	1.46692	3.64465	-0.710814	0.263235	0.622633	-0.0962
1959.37	3.22893	3.95971	2.49815	1.47481	3.65316	-0.703546	0.264657	0.624105	-0.0948
1959.46	3.23318	3.96491	2.50146	1.4828	3.66178	-0.696174	0.266096	0.625595	-0.0934
1959.54	3.23749	3.97017	2.5048	1.49091	3.67051	-0.688696	0.267553	0.627102	-0.092
1959.62	3.24184	3.9755	2.50819	1.49912	3.67936	-0.681112	0.269028	0.628627	-0.0906
1959.71	3.24625	3.9809	2.51161	1.50744	3.68831	-0.67342	0.27052	0.63017	-0.0891
1959.79	3.25072	3.98637	2.51506	1.51588	3.69737	-0.665622	0.272029	0.631731	-0.0877
1959.87	3.25524	3.99192	2.51856	1.52442	3.70655	-0.657715	0.273557	0.63331	-0.0862
1959.96	3.25982	3.99754	2.5221	1.53307	3.71584	-0.649699	0.275102	0.634908	-0.0847
1960.04	3.26445	4.00323	2.52568	1.54183	3.72524	-0.641574	0.276666	0.636523	-0.0832
1960.12	3.26915	4.00899	2.5293	1.5507	3.73475	-0.633339	0.278248	0.638158	-0.0817
1960.21	3.2739	4.01483	2.53296	1.55969	3.74437	-0.624994	0.279848	0.639811	-0.0801
1960.29	3.2787	4.02074	2.53667	1.56879	3.75411	-0.616537	0.281467	0.641482	-0.0785
1960.37	3.28357	4.02673	2.54041	1.578	3.76397	-0.607968	0.283105	0.643173	-0.077
1960.46	3.2885	4.03279	2.5442	1.58732	3.77393	-0.599286	0.284761	0.644883	-0.0754
1960.54	3.29349	4.03894	2.54804	1.59676	3.78401	-0.590492	0.286436	0.646612	-0.0737
1960.62	3.29854	4.04515	2.55192	1.60631	3.79421	-0.581584	0.28813	0.64836	-0.0721
1960.71	3.30365	4.05145	2.55584	1.61598	3.80452	-0.572562	0.289844	0.650128	-0.0704
1960.79	3.30882	4.05783	2.55982	1.62576	3.81494	-0.563425	0.291577	0.651915	-0.0688
1960.87	3.31406	4.06428	2.56384	1.63566	3.82549	-0.554172	0.293329	0.653722	-0.0671
1960.96	3.31936	4.07082	2.5679	1.64567	3.83614	-0.544804	0.295101	0.655549	-0.0653
1961.04	3.32472	4.07743	2.57202	1.6558	3.84692	-0.535319	0.296893	0.657396	-0.0636
1961.12	3.33015	4.08412	2.57618	1.66604	3.85781	-0.525717	0.298704	0.659263	-0.0619
1961.21	3.33565	4.0909	2.58039	1.67641	3.86881	-0.515997	0.300536	0.66115	-0.0601
1961.29	3.34121	4.09776	2.58466	1.68689	3.87994	-0.506159	0.302387	0.663058	-0.0583
1961.37	3.34684	4.1047	2.58897	1.69749	3.89118	-0.496203	0.304259	0.664986	-0.0565
1961.46	3.35253	4.11172	2.59334	1.70821	3.90254	-0.486127	0.306152	0.666934	-0.0546
1961.54	3.3583	4.11883	2.59776	1.71904	3.91402	-0.475932	0.308064	0.668904	-0.0528
1961.62	3.36413	4.12602	2.60223	1.73	3.92561	-0.465616	0.309998	0.670894	-0.0509
1961.71	3.37003	4.1333	2.60676	1.74107	3.93733	-0.45518	0.311952	0.672906	-0.049
1961.79	3.376	4.14066	2.61134	1.75227	3.94916	-0.444623	0.313928	0.674938	-0.0471
1961.87	3.38204	4.14811	2.61598	1.76359	3.96112	-0.433944	0.315924	0.676992	-0.0451
1961.96	3.38816	4.15564	2.62067	1.77502	3.97319	-0.423142	0.317942	0.679067	-0.0432
1962.04	3.39434	4.16326	2.62542	1.78658	3.98538	-0.412219	0.319981	0.681164	-0.0412
1962.12	3.4006	4.17097	2.63023	1.79826	3.9977	-0.401172	0.322041	0.683283	-0.0392
1962.21	3.40693	4.17877	2.6351	1.81006	4.01013	-0.390001	0.324123	0.685423	-0.0372
1962.29	3.41334	4.18665	2.64002	1.82199	4.02268	-0.378707	0.326227	0.687585	-0.0351
1962.37	3.41982	4.19462	2.64501	1.83404	4.03536	-0.367288	0.328352	0.689769	-0.0331
1962.46	3.42637	4.20269	2.65006	1.84621	4.04816	-0.355744	0.3305	0.691975	-0.031
1962.54	3.433	4.21084	2.65517	1.8585	4.06108	-0.344075	0.332669	0.694204	-0.0289
1962.62	3.43971	4.21908	2.66034	1.87092	4.07412	-0.332281	0.334861	0.696455	-0.0267
1962.71	3.4465	4.22741	2.66558	1.88346	4.08728	-0.32036	0.337076	0.698728	-0.0246
1962.79	3.45336	4.23584	2.67088	1.89613	4.10056	-0.308313	0.339313	0.701024	-0.0224
1962.87	3.4603	4.24435	2.67625	1.90892	4.11397	-0.29614	0.341572	0.703343	-0.0202
1962.96	3.46732	4.25296	2.68168	1.92183	4.1275	-0.283839	0.343854	0.705684	-0.018
1963.04	3.47442	4.26166	2.68718	1.93487	4.14116	-0.271411	0.346159	0.708049	-0.0157
1963.12	3.4816	4.27045	2.69275	1.94804	4.15493	-0.258855	0.348487	0.710437	-0.0135
1963.21	3.48886	4.27933	2.69838	1.96133	4.16883	-0.246171	0.350839	0.712848	-0.0112
1963.29	3.4962	4.28831	2.70409	1.97475	4.18286	-0.233358	0.353213	0.715282	-0.00886
1963.37	3.50362	4.29738	2.70986	1.9883	4.19701	-0.220417	0.355611	0.717739	-0.00652
1963.46	3.51113	4.30655	2.71571	2.00197	4.21128	-0.207346	0.358033	0.720221	-0.00416
1963.54	3.51872	4.31581	2.72163	2.01577	4.22568	-0.194146	0.360478	0.722725	-0.00177
1963.62	3.5264	4.32517	2.72762	2.02969	4.2402	-0.180817	0.362947	0.725254	0.000639
1963.71	3.53416	4.33462	2.73369	2.04375	4.25485	-0.167358	0.365439	0.727806	0.00307
1963.79	3.542	4.34417	2.73983	2.05793	4.26963	-0.153769	0.367956	0.730383	0.00553
1963.87	3.54993	4.35382	2.74605	2.07224	4.28453	-0.140049	0.370497	0.732983	0.00801
1963.96	3.55795	4.36356	2.75234	2.08668	4.29955	-0.126199	0.373062	0.735608	0.0105
1964.04	3.56605	4.3734	2.75871	2.10124	4.31471	-0.112218	0.375651	0.738257	0.013
1964.12	3.57425	4.38333	2.76516	2.11594	4.32998	-0.0981	0.378265	0.74093	0.0156
1964.21	3.58253	4.39336	2.77169	2.13076	4.34539	-0.0839	0.380904	0.743628	0.0182
1964.29	3.5909	4.4035	2.7783	2.14572	4.36092	-0.0695	0.383567	0.746351	0.0208
1964.37	3.59936	4.41373	2.78499	2.1608	4.37658	-0.055	0.386255	0.749098	0.0234
1964.46	3.60791	4.42405	2.79177	2.17601	4.39237	-0.0403	0.388968	0.75187	0.0261
1964.54	3.61655	4.43448	2.79862	2.19135	4.40828	-0.0256	0.391706	0.754667	0.0287
1964.62	3.62529	4.44501	2.80557	2.20682	4.42432	-0.0107	0.394469	0.757489	0.0314
1964.71	3.63411	4.45563	2.81259	2.22243	4.44049	0.00436	0.397258	0.760336	0.0342
1964.79	3.64303	4.46636	2.8197	2.23816	4.45679	0.0195	0.400071	0.763208	0.0369
1964.87	3.65204	4.47718	2.8269	2.25402	4.47322	0.0348	0.402911	0.766106	0.0397
1964.96	3.66115	4.4881	2.83419	2.27001	4.48977	0.0502	0.405776	0.769029	0.0425
1965.04	3.67035	4.49913	2.84157	2.28613	4.50646	0.0658	0.408666	0.771977	0.0454
1965.12	3.67964	4.51026	2.84903	2.30239	4.52327	0.0815	0.411582	0.774951	0.0482
1965.21	3.68904	4.52148	2.85659	2.31877	4.54021	0.0973	0.414525	0.777951	0.0511
1965.29	3.69852	4.53281	2.86423	2.33529	4.55729	0.11329	0.417493	0.780976	0.054
1965.37	3.70811	4.54424	2.87198	2.35193	4.57449	0.129381	0.420487	0.784027	0.0569
1965.46	3.71779	4.55577	2.87981	2.36871	4.59182	0.145604	0.423508	0.787104	0.0599
1965.54	3.72757	4.5674	2.88774	2.38562	4.60928	0.16196	0.426555	0.790207	0.0629
1965.62	3.73745	4.57914	2.89576	2.40266	4.62687	0.178448	0.429628	0.793336	0.0659
1965.71	3.74743	4.59098	2.90388	2.41983	4.6446	0.195068	0.432728	0.796492	0.069
1965.79	3.75751	4.60292	2.9121	2.43713	4.66245	0.21182	0.435854	0.799673	0.072
1965.87	3.76769	4.61496	2.92042	2.45457	4.68043	0.228703	0.439007	0.802881	0.0751
1965.96	3.77797	4.6271	2.92883	2.47213	4.69855	0.245719	0.442187	0.806116	0.0783
1966.04	3.78835	4.63935	2.93735	2.48983	4.7168	0.262867	0.445394	0.809377	0.0814
1966.12	3.79883	4.6517	2.94596	2.50766	4.73517	0.280146	0.448627	0.812664	0.0846
1966.21	3.80942	4.66415	2.95468	2.52562	4.75368	0.297556	0.451888	0.815978	0.0878
1966.29	3.82011	4.67671	2.9635	2.54371	4.77233	0.315098	0.455176	0.819319	0.091
1966.37	3.8309	4.68937	2.97243	2.56194	4.7911	0.332771	0.458491	0.822686	0.0943
1966.46	3.8418	4.70214	2.98146	2.58029	4.81001	0.350574	0.461833	0.826081	0.0976
1966.54	3.8528	4.715	2.9906	2.59878	4.82904	0.368509	0.465203	0.829502	0.100903
1966.62	3.86391	4.72798	2.99984	2.61739	4.84821	0.386573	0.4686	0.83295	0.104249
1966.71	3.87512	4.74105	3.00919	2.63614	4.86752	0.404768	0.472024	0.836426	0.107623
1966.79	3.88644	4.75423	3.01865	2.65502	4.88695	0.423093	0.475476	0.839928	0.111024
1966.87	3.89787	4.76751	3.02822	2.67403	4.90652	0.441547	0.478956	0.843458	0.114454
1966.96	3.9094	4.7809	3.0379	2.69318	4.92622	0.460131	0.482464	0.847015	0.117912
1967.04	3.92104	4.79439	3.04769	2.71245	4.94606	0.478843	0.485999	0.850599	0.121399
1967.12	3.93279	4.80799	3.05759	2.73186	4.96603	0.497685	0.489562	0.854211	0.124914
1967.21	3.94465	4.82169	3.0676	2.75139	4.98613	0.516654	0.493153	0.85785	0.128457
1967.29	3.95662	4.8355	3.07773	2.77106	5.00637	0.535752	0.496773	0.861517	0.132028
1967.37	3.96869	4.84941	3.08798	2.79086	5.02674	0.554977	0.50042	0.865211	0.135629
1967.46	3.98088	4.86342	3.09834	2.81078	5.04724	0.574329	0.504095	0.868933	0.139258
1967.54	3.99318	4.87754	3.10882	2.83084	5.06788	0.593808	0.507799	0.872682	0.142915
1967.62	4.00559	4.89176	3.11941	2.85103	5.08865	0.613413	0.51153	0.876459	0.146601
1967.71	4.01811	4.90609	3.13012	2.87135	5.10956	0.633144	0.51529	0.880264	0.150316
1967.79	4.03074	4.92052	3.14096	2.8918	5.1306	0.653	0.519079	0.884097	0.15406
1967.87	4.04348	4.93506	3.15191	2.91238	5.15177	0.672982	0.522895	0.887958	0.157833
1967.96	4.05634	4.9497	3.16298	2.93309	5.17308	0.693087	0.526741	0.891846	0.161635
1968.04	4.06931	4.96445	3.17417	2.95392	5.19453	0.713317	0.530614	0.895763	0.165466
1968.12	4.08239	4.9793	3.18549	2.97489	5.21611	0.73367	0.534516	0.899707	0.169326
1968.21	4.09559	4.99425	3.19693	2.99599	5.23783	0.754146	0.538447	0.90368	0.173214
1968.29	4.1089	5.00931	3.2085	3.01721	5.25968	0.774744	0.542406	0.907681	0.177132
1968.37	4.12233	5.02448	3.22018	3.03856	5.28166	0.795463	0.546394	0.91171	0.181079
1968.46	4.13587	5.03975	3.232	3.06004	5.30379	0.816304	0.550411	0.915767	0.185056
1968.54	4.14953	5.05512	3.24394	3.08165	5.32604	0.837265	0.554456	0.919852	0.189061
1968.62	4.1633	5.0706	3.25601	3.10339	5.34843	0.858346	0.55853	0.923966	0.193095
1968.71	4.17719	5.08618	3.26821	3.12525	5.37096	0.879547	0.562633	0.928107	0.197159
1968.79	4.1912	5.10186	3.28053	3.14725	5.39363	0.900865	0.566765	0.932278	0.201252
1968.87	4.20532	5.11765	3.29299	3.16936	5.41643	0.922302	0.570925	0.936476	0.205374
1968.96	4.21956	5.13355	3.30557	3.19161	5.43936	0.943856	0.575114	0.940703	0.209526
1969.04	4.23392	5.14955	3.31829	3.21398	5.46243	0.965526	0.579333	0.944959	0.213707
1969.12	4.24839	5.16565	3.33113	3.23648	5.48564	0.987312	0.583579	0.949242	0.217916
1969.21	4.26298	5.18185	3.34411	3.2591	5.50898	1.00921	0.587855	0.953555	0.222156
1969.29	4.27769	5.19816	3.35723	3.28184	5.53246	1.03123	0.59216	0.957896	0.226424
1969.37	4.29252	5.21457	3.37047	3.30472	5.55608	1.05336	0.596493	0.962265	0.230722
1969.46	4.30747	5.23109	3.38385	3.32771	5.57983	1.0756	0.600856	0.966663	0.235048
1969.54	4.32254	5.24771	3.39737	3.35083	5.60372	1.09795	0.605247	0.97109	0.239404
1969.62	4.33772	5.26443	3.41102	3.37408	5.62774	1.12041	0.609667	0.975545	0.243789
1969.71	4.35303	5.28126	3.4248	3.39744	5.6519	1.14299	0.614116	0.980029	0.248203
1969.79	4.36846	5.29818	3.43873	3.42093	5.67619	1.16567	0.618594	0.984541	0.252647
1969.87	4.384	5.31521	3.45279	3.44454	5.70063	1.18846	0.623101	0.989083	0.257119
1969.96	4.39967	5.33235	3.46698	3.46828	5.72519	1.21136	0.627636	0.993652	0.26162
1970.04	4.41545	5.34958	3.48132	3.49213	5.7499	1.23437	0.632201	0.998251	0.266151
1970.12	4.43136	5.36692	3.4958	3.51611	5.77474	1.25748	0.636794	1.00288	0.27071
1970.21	4.44738	5.38436	3.51041	3.5402	5.79971	1.2807	0.641416	1.00753	0.275298
1970.29	4.46353	5.4019	3.52516	3.56442	5.82482	1.30402	0.646067	1.01222	0.279914
1970.37	4.4798	5.41954	3.54006	3.58876	5.85007	1.32744	0.650746	1.01693	0.28456
1970.46	4.49619	5.43729	3.55509	3.61321	5.87545	1.35097	0.655455	1.02168	0.289234
1970.54	4.5127	5.45513	3.57027	3.63778	5.90097	1.37459	0.660192	1.02645	0.293937
1970.62	4.52933	5.47308	3.58559	3.66247	5.92663	1.39832	0.664957	1.03125	0.298668
1970.71	4.54609	5.49112	3.60105	3.68728	5.95242	1.42214	0.669751	1.03608	0.303428
1970.79	4.56296	5.50927	3.61665	3.71221	5.97834	1.44607	0.674574	1.04093	0.308216
1970.87	4.57996	5.52752	3.6324	3.73725	6.00441	1.47009	0.679425	1.04582	0.313032
1970.96	4.59708	5.54586	3.64829	3.7624	6.0306	1.4942	0.684305	1.05073	0.317876
1971.04	4.61432	5.56431	3.66432	3.78767	6.05693	1.51841	0.689213	1.05568	0.322749
1971.12	4.63168	5.58286	3.6805	3.81306	6.0834	1.54272	0.69415	1.06065	0.327649
1971.21	4.64916	5.6015	3.69682	3.83856	6.11	1.56711	0.699114	1.06565	0.332577
1971.29	4.66676	5.62025	3.71328	3.86417	6.13674	1.5916	0.704108	1.07068	0.337533
1971.37	4.68449	5.63909	3.72989	3.88989	6.16361	1.61618	0.709129	1.07574	0.342517
1971.46	4.70234	5.65803	3.74664	3.91573	6.19061	1.64085	0.714178	1.08083	0.347528
1971.54	4.72031	5.67707	3.76354	3.94168	6.21775	1.6656	0.719256	1.08595	0.352566
1971.62	4.7384	5.69621	3.78059	3.96773	6.24502	1.69044	0.724361	1.09109	0.357631
1971.71	4.75661	5.71544	3.79778	3.9939	6.27243	1.71537	0.729494	1.09626	0.362724
1971.79	4.77494	5.73477	3.81511	4.02018	6.29997	1.74038	0.734655	1.10147	0.367844
1971.87	4.7934	5.7542	3.8326	4.04656	6.32764	1.76548	0.739844	1.1067	0.37299
1971.96	4.81197	5.77372	3.85022	4.07305	6.35545	1.79066	0.745061	1.11196	0.378163
1972.04	4.83067	5.79335	3.868	4.09965	6.38338	1.81592	0.750305	1.11725	0.383362
1972.12	4.84949	5.81306	3.88592	4.12635	6.41145	1.84125	0.755576	1.12256	0.388588
1972.21	4.86843	5.83287	3.90398	4.15316	6.43966	1.86667	0.760875	1.12791	0.39384
1972.29	4.88749	5.85278	3.92219	4.18008	6.46799	1.89216	0.766201	1.13329	0.399117
1972.37	4.90667	5.87278	3.94055	4.2071	6.49646	1.91773	0.771555	1.13869	0.404421
1972.46	4.92597	5.89288	3.95906	4.23422	6.52505	1.94338	0.776935	1.14412	0.40975
1972.54	4.94539	5.91307	3.97771	4.26144	6.55378	1.9691	0.782342	1.14958	0.415105
1972.62	4.96493	5.93336	3.9965	4.28876	6.58264	1.99488	0.787776	1.15507	0.420484
1972.71	4.98459	5.95373	4.01544	4.31619	6.61163	2.02075	0.793237	1.16059	0.425889
1972.79	5.00437	5.97421	4.03453	4.34371	6.64074	2.04668	0.798725	1.16613	0.431319
1972.87	5.02427	5.99477	4.05376	4.37133	6.66999	2.07267	0.804239	1.1717	0.436773
1972.96	5.04428	6.01542	4.07314	4.39905	6.69937	2.09874	0.809779	1.17731	0.442251
1973.04	5.06442	6.03617	4.09267	4.42687	6.72887	2.12487	0.815346	1.18294	0.447754
1973.12	5.08467	6.05701	4.11233	4.45478	6.7585	2.15106	0.820938	1.1886	0.453281
1973.21	5.10504	6.07794	4.13215	4.48279	6.78826	2.17732	0.826557	1.19428	0.458831
1973.29	5.12553	6.09896	4.1521	4.51089	6.81814	2.20364	0.832201	1.2	0.464405
1973.37	5.14614	6.12007	4.17221	4.53909	6.84815	2.23002	0.837871	1.20574	0.470002
1973.46	5.16686	6.14127	4.19245	4.56737	6.87829	2.25646	0.843567	1.21151	0.475622
1973.54	5.1877	6.16256	4.21284	4.59575	6.90855	2.28295	0.849288	1.21731	0.481265
1973.62	5.20866	6.18394	4.23337	4.62422	6.93894	2.3095	0.855034	1.22314	0.48693
1973.71	5.22973	6.2054	4.25405	4.65278	6.96945	2.33611	0.860805	1.22899	0.492617
1973.79	5.25091	6.22696	4.27487	4.68142	7.00008	2.36277	0.866601	1.23487	0.498327
1973.87	5.27221	6.2486	4.29582	4.71016	7.03083	2.38948	0.872421	1.24079	0.504058
1973.96	5.29363	6.27033	4.31692	4.73898	7.06171	2.41624	0.878267	1.24672	0.50981
1974.04	5.31515	6.29214	4.33817	4.76788	7.09271	2.44305	0.884136	1.25269	0.515584
1974.12	5.33679	6.31404	4.35955	4.79687	7.12383	2.46991	0.89003	1.25868	0.521378
1974.21	5.35855	6.33603	4.38107	4.82594	7.15507	2.49681	0.895948	1.2647	0.527193
1974.29	5.38041	6.3581	4.40273	4.85509	7.18643	2.52376	0.901889	1.27075	0.533029
1974.37	5.40239	6.38026	4.42452	4.88433	7.2179	2.55075	0.907854	1.27683	0.538884
1974.46	5.42448	6.4025	4.44646	4.91364	7.2495	2.57779	0.913843	1.28293	0.544759
1974.54	5.44668	6.42482	4.46853	4.94304	7.28121	2.60486	0.919855	1.28906	0.550653
1974.62	5.46898	6.44723	4.49074	4.97251	7.31303	2.63198	0.92589	1.29521	0.556566
1974.71	5.4914	6.46972	4.51309	5.00205	7.34497	2.65913	0.931947	1.3014	0.562499
1974.79	5.51393	6.49229	4.53557	5.03167	7.37703	2.68632	0.938028	1.30761	0.568449
1974.87	5.53656	6.51494	4.55818	5.06137	7.4092	2.71354	0.94413	1.31384	0.574418
1974.96	5.5593	6.53767	4.58092	5.09114	7.44148	2.7408	0.950255	1.32011	0.580404
1975.04	5.58214	6.56048	4.6038	5.12098	7.47387	2.76809	0.956402	1.3264	0.586408
1975.12	5.60509	6.58338	4.62681	5.15089	7.50637	2.79541	0.962571	1.33271	0.592429
1975.21	5.62815	6.60635	4.64995	5.18087	7.53898	2.82276	0.968761	1.33906	0.598466
1975.29	5.65131	6.6294	4.67322	5.21092	7.5717	2.85014	0.974972	1.34542	0.60452
1975.37	5.67457	6.65253	4.69662	5.24103	7.60453	2.87754	0.981205	1.35182	0.61059
1975.46	5.69794	6.67573	4.72014	5.27121	7.63746	2.90497	0.987458	1.35824	0.616676
1975.54	5.7214	6.69902	4.74379	5.30146	7.6705	2.93242	0.993732	1.36469	0.622777
1975.62	5.74497	6.72238	4.76757	5.33177	7.70364	2.9599	1.00003	1.37116	0.628893
1975.71	5.76864	6.74581	4.79147	5.36214	7.73688	2.98739	1.00634	1.37766	0.635024
1975.79	5.79241	6.76932	4.81549	5.39257	7.77023	3.01491	1.01267	1.38418	0.641169
1975.87	5.81627	6.79291	4.83963	5.42305	7.80367	3.04244	1.01903	1.39073	0.647328
1975.96	5.84023	6.81656	4.8639	5.4536	7.83721	3.06999	1.0254	1.3973	0.6535
1976.04	5.86429	6.8403	4.88828	5.4842	7.87086	3.09755	1.03179	1.4039	0.659686
1976.12	5.88844	6.8641	4.91278	5.51486	7.90459	3.12513	1.0382	1.41052	0.665884
1976.21	5.91269	6.88798	4.9374	5.54557	7.93843	3.15272	1.04463	1.41717	0.672095
1976.29	5.93703	6.91192	4.96213	5.57634	7.97235	3.18032	1.05108	1.42384	0.678317
1976.37	5.96146	6.93594	4.98698	5.60715	8.00637	3.20793	1.05754	1.43054	0.684551
1976.46	5.98598	6.96003	5.01194	5.63801	8.04048	3.23554	1.06403	1.43726	0.690797
1976.54	6.0106	6.98419	5.03701	5.66893	8.07468	3.26317	1.07053	1.444	0.697053
1976.62	6.0353	7.00841	5.06218	5.69988	8.10897	3.2908	1.07704	1.45077	0.703319
1976.71	6.06009	7.03271	5.08747	5.73089	8.14334	3.31843	1.08358	1.45756	0.709596
1976.79	6.08497	7.05707	5.11286	5.76194	8.1778	3.34607	1.09013	1.46437	0.715882
1976.87	6.10993	7.08149	5.13836	5.79303	8.21235	3.3737	1.09669	1.47121	0.722177
1976.96	6.13498	7.10599	5.16396	5.82416	8.24697	3.40134	1.10328	1.47807	0.728481
1977.04	6.16011	7.13055	5.18966	5.85533	8.28167	3.42898	1.10987	1.48495	0.734794
1977.12	6.18532	7.15517	5.21547	5.88653	8.31646	3.45661	1.11649	1.49186	0.741114
1977.21	6.21061	7.17986	5.24137	5.91778	8.35132	3.48424	1.12311	1.49879	0.747442
1977.29	6.23598	7.20461	5.26736	5.94906	8.38625	3.51186	1.12976	1.50574	0.753777
1977.37	6.26143	7.22942	5.29345	5.98037	8.42126	3.53947	1.13641	1.51271	0.760118
1977.46	6.28696	7.25429	5.31964	6.01171	8.45634	3.56708	1.14308	1.5197	0.766466
1977.54	6.31257	7.27922	5.34591	6.04308	8.49149	3.59468	1.14977	1.52671	0.77282
1977.62	6.33825	7.30422	5.37227	6.07449	8.52671	3.62226	1.15646	1.53375	0.779179
1977.71	6.364	7.32927	5.39872	6.10592	8.56199	3.64984	1.16317	1.5408	0.785543
1977.79	6.38982	7.35438	5.42526	6.13737	8.59734	3.6774	1.1699	1.54788	0.791912
1977.87	6.41571	7.37955	5.45187	6.16885	8.63275	3.70494	1.17663	1.55498	0.798285
1977.96	6.44168	7.40478	5.47857	6.20035	8.66823	3.73247	1.18338	1.56209	0.804662
1978.04	6.46771	7.43006	5.50535	6.23187	8.70376	3.75998	1.19013	1.56923	0.811041
1978.12	6.4938	7.4554	5.5322	6.26341	8.73934	3.78747	1.1969	1.57638	0.817424
1978.21	6.51996	7.48079	5.55913	6.29497	8.77498	3.81495	1.20368	1.58356	0.823809
1978.29	6.54618	7.50623	5.58613	6.32654	8.81068	3.8424	1.21047	1.59075	0.830196
1978.37	6.57247	7.53173	5.61321	6.35812	8.84642	3.86982	1.21727	1.59796	0.836585
1978.46	6.59881	7.55728	5.64035	6.38972	8.88222	3.89723	1.22408	1.60519	0.842975
1978.54	6.62522	7.58288	5.66755	6.42133	8.91805	3.92461	1.2309	1.61243	0.849365
1978.62	6.65168	7.60853	5.69482	6.45295	8.95394	3.95196	1.23773	1.6197	0.855756
1978.71	6.67819	7.63423	5.72216	6.48457	8.98986	3.97928	1.24456	1.62698	0.862146
1978.79	6.70476	7.65998	5.74955	6.5162	9.02583	4.00658	1.25141	1.63427	0.868536
1978.87	6.73138	7.68577	5.777	6.54783	9.06183	4.03384	1.25826	1.64159	0.874925
1978.96	6.75806	7.71161	5.8045	6.57947	9.09786	4.06107	1.26511	1.64892	0.881312
1979.04	6.78478	7.7375	5.83205	6.6111	9.13393	4.08828	1.27198	1.65626	0.887697
1979.12	6.81154	7.76343	5.85966	6.64274	9.17003	4.11544	1.27885	1.66362	0.89408
1979.21	6.83836	7.7894	5.88731	6.67437	9.20616	4.14257	1.28573	1.671	0.90046
1979.29	6.86521	7.81542	5.915	6.70599	9.24231	4.16967	1.29261	1.67839	0.906837
1979.37	6.89211	7.84148	5.94274	6.73761	9.27849	4.19673	1.2995	1.68579	0.91321
1979.46	6.91905	7.86758	5.97052	6.76922	9.31468	4.22375	1.30639	1.69321	0.919579
1979.54	6.94602	7.89371	5.99833	6.80081	9.3509	4.25073	1.31329	1.70064	0.925944
1979.62	6.97304	7.91989	6.02618	6.8324	9.38713	4.27766	1.32019	1.70808	0.932303
1979.71	7.00008	7.9461	6.05406	6.86397	9.42337	4.30456	1.32709	1.71553	0.938657
1979.79	7.02716	7.97235	6.08198	6.89552	9.45963	4.33141	1.334	1.723	0.945005
1979.87	7.05427	7.99864	6.10991	6.92705	9.49589	4.35822	1.34091	1.73048	0.951347
1979.96	7.08141	8.02496	6.13787	6.95857	9.53216	4.38498	1.34782	1.73797	0.957682
1980.04	7.10858	8.05131	6.16585	6.99006	9.56843	4.4117	1.35474	1.74546	0.96401
1980.12	7.13577	8.07769	6.19385	7.02153	9.6047	4.43837	1.36165	1.75297	0.970331
1980.21	7.16299	8.1041	6.22187	7.05297	9.64096	4.46498	1.36857	1.76049	0.976643
1980.29	7.19022	8.13055	6.2499	7.08439	9.67722	4.49155	1.37548	1.76802	0.982947
1980.37	7.21748	8.15702	6.27794	7.11577	9.71348	4.51807	1.3824	1.77555	0.989242
1980.46	7.24475	8.18351	6.30598	7.14713	9.74972	4.54454	1.38931	1.7831	0.995528
1980.54	7.27203	8.21004	6.33403	7.17845	9.78595	4.57095	1.39623	1.79065	1.0018
1980.62	7.29933	8.23658	6.36208	7.20973	9.82216	4.5973	1.40314	1.79821	1.00807
1980.71	7.32665	8.26316	6.39014	7.24098	9.85835	4.6236	1.41005	1.80577	1.01433
1980.79	7.35396	8.28975	6.41818	7.27218	9.89452	4.64985	1.41695	1.81334	1.02057
1980.87	7.38129	8.31636	6.44622	7.30335	9.93066	4.67603	1.42386	1.82092	1.0268
1980.96	7.40862	8.34299	6.47425	7.33447	9.96678	4.70216	1.43076	1.8285	1.03302
1981.04	7.43595	8.36964	6.50227	7.36555	10.0029	4.72823	1.43766	1.83608	1.03923
1981.12	7.46329	8.39631	6.53027	7.39657	10.0389	4.75423	1.44455	1.84367	1.04543
1981.21	7.49062	8.42299	6.55825	7.42755	10.0749	4.78018	1.45143	1.85126	1.05161
1981.29	7.51794	8.44968	6.58621	7.45848	10.1109	4.80606	1.45832	1.85885	1.05778
1981.37	7.54526	8.47638	6.61414	7.48935	10.1468	4.83187	1.46519	1.86644	1.06394
1981.46	7.57257	8.5031	6.64205	7.52017	10.1827	4.85762	1.47206	1.87404	1.07008
1981.54	7.59987	8.52982	6.66992	7.55093	10.2185	4.88331	1.47892	1.88164	1.07621
1981.62	7.62716	8.55655	6.69777	7.58163	10.2543	4.90892	1.48578	1.88923	1.08232
1981.71	7.65443	8.58329	6.72557	7.61226	10.2901	4.93447	1.49262	1.89683	1.08842
1981.79	7.68168	8.61003	6.75334	7.64283	10.3257	4.95995	1.49946	1.90442	1.0945
1981.87	7.70892	8.63678	6.78106	7.67334	10.3613	4.98536	1.50629	1.91201	1.10056
1981.96	7.73613	8.66352	6.80874	7.70378	10.3969	5.01069	1.5131	1.9196	1.10661
1982.04	7.76331	8.69026	6.83636	7.73414	10.4323	5.03596	1.51991	1.92719	1.11264
1982.12	7.79047	8.717	6.86394	7.76444	10.4677	5.06115	1.52671	1.93477	1.11865
1982.21	7.8176	8.74373	6.89146	7.79466	10.5031	5.08626	1.5335	1.94235	1.12465
1982.29	7.84469	8.77046	6.91892	7.8248	10.5383	5.1113	1.54027	1.94992	1.13063
1982.37	7.87175	8.79718	6.94632	7.85486	10.5735	5.13626	1.54703	1.95748	1.13658
1982.46	7.89878	8.82389	6.97366	7.88484	10.6085	5.16115	1.55378	1.96504	1.14252
1982.54	7.92576	8.85059	7.00093	7.91474	10.6435	5.18595	1.56052	1.97259	1.14844
1982.62	7.9527	8.87727	7.02813	7.94455	10.6784	5.21068	1.56724	1.98014	1.15434
1982.71	7.9796	8.90394	7.05526	7.97428	10.7132	5.23532	1.57395	1.98767	1.16022
1982.79	8.00644	8.93058	7.0823	8.00391	10.7479	5.25989	1.58064	1.99519	1.16608
1982.87	8.03324	8.95721	7.10927	8.03345	10.7825	5.28437	1.58732	2.00271	1.17192
1982.96	8.05999	8.98382	7.13616	8.0629	10.817	5.30876	1.59398	2.01021	1.17774
1983.04	8.08668	9.0104	7.16296	8.09225	10.8514	5.33307	1.60062	2.0177	1.18354
1983.12	8.11331	9.03695	7.18968	8.1215	10.8857	5.3573	1.60725	2.02518	1.18931
1983.21	8.13989	9.06348	7.2163	8.15065	10.9199	5.38144	1.61385	2.03265	1.19506
1983.29	8.1664	9.08997	7.24282	8.1797	10.9539	5.40549	1.62044	2.0401	1.20079
1983.37	8.19284	9.11643	7.26925	8.20864	10.9878	5.42945	1.62701	2.04753	1.2065
1983.46	8.21922	9.14285	7.29558	8.23747	11.0216	5.45332	1.63356	2.05495	1.21218
1983.54	8.24552	9.16924	7.32181	8.2662	11.0553	5.4771	1.6401	2.06236	1.21784
1983.62	8.27175	9.19558	7.34792	8.29481	11.0888	5.50079	1.64661	2.06974	1.22347
1983.71	8.29791	9.22188	7.37393	8.3233	11.1222	5.52439	1.65309	2.07711	1.22908
1983.79	8.32398	9.24814	7.39983	8.35168	11.1555	5.54789	1.65956	2.08446	1.23466
1983.87	8.34998	9.27435	7.42561	8.37994	11.1886	5.5713	1.666	2.09179	1.24022
1983.96	8.37589	9.3005	7.45127	8.40808	11.2215	5.59461	1.67243	2.0991	1.24575
1984.04	8.40171	9.3266	7.47681	8.43609	11.2544	5.61782	1.67882	2.10638	1.25126
1984.12	8.42744	9.35265	7.50223	8.46398	11.287	5.64094	1.6852	2.11365	1.25674
1984.21	8.45308	9.37864	7.52752	8.49174	11.3195	5.66395	1.69154	2.12089	1.2622
1984.29	8.47862	9.40456	7.55268	8.51936	11.3519	5.68687	1.69787	2.12811	1.26762
1984.37	8.50407	9.43042	7.57771	8.54686	11.384	5.70969	1.70416	2.1353	1.27302
1984.46	8.52941	9.45622	7.6026	8.57422	11.416	5.7324	1.71043	2.14247	1.27839
1984.54	8.55465	9.48194	7.62735	8.60144	11.4479	5.75501	1.71668	2.14961	1.28374
1984.62	8.57978	9.50759	7.65196	8.62852	11.4795	5.77752	1.72289	2.15673	1.28905
1984.71	8.6048	9.53316	7.67643	8.65546	11.511	5.79992	1.72908	2.16382	1.29434
1984.79	8.62971	9.55866	7.70075	8.68225	11.5423	5.82221	1.73523	2.17087	1.29959
1984.87	8.6545	9.58407	7.72493	8.70889	11.5734	5.8444	1.74136	2.1779	1.30482
1984.96	8.67917	9.6094	7.74894	8.73539	11.6043	5.86648	1.74746	2.1849	1.31002
1985.04	8.70372	9.63463	7.77281	8.76173	11.635	5.88845	1.75352	2.19186	1.31519
1985.12	8.72815	9.65978	7.79652	8.78792	11.6655	5.91031	1.75956	2.19879	1.32032
1985.21	8.75245	9.68483	7.82006	8.81396	11.6959	5.93206	1.76556	2.20569	1.32543
1985.29	8.77662	9.70979	7.84345	8.83983	11.726	5.95369	1.77153	2.21256	1.3305
1985.37	8.80065	9.73464	7.86666	8.86554	11.7559	5.97521	1.77747	2.21939	1.33554
1985.46	8.82455	9.75938	7.88971	8.89109	11.7856	5.99662	1.78337	2.22618	1.34055
1985.54	8.84831	9.78402	7.91259	8.91647	11.815	6.01791	1.78924	2.23294	1.34553
1985.62	8.87192	9.80855	7.9353	8.94168	11.8443	6.03908	1.79507	2.23966	1.35048
1985.71	8.89539	9.83296	7.95783	8.96673	11.8733	6.06014	1.80086	2.24634	1.35539
1985.79	8.91872	9.85725	7.98018	8.9916	11.9021	6.08108	1.80662	2.25298	1.36027
1985.87	8.94189	9.88142	8.00235	9.01629	11.9307	6.1019	1.81235	2.25958	1.36511
1985.96	8.9649	9.90547	8.02433	9.0408	11.959	6.12259	1.81803	2.26614	1.36993
1986.04	8.98776	9.92938	8.04614	9.06514	11.9871	6.14316	1.82368	2.27265	1.3747
1986.12	9.01046	9.95317	8.06775	9.08929	12.015	6.16361	1.82928	2.27912	1.37944
1986.21	9.03299	9.97681	8.08917	9.11325	12.0426	6.18394	1.83485	2.28555	1.38415
1986.29	9.05536	10.0003	8.1104	9.13703	12.0699	6.20414	1.84038	2.29194	1.38882
1986.37	9.07755	10.0237	8.13143	9.16061	12.097	6.22421	1.84587	2.29827	1.39346
1986.46	9.09958	10.0469	8.15226	9.18401	12.1239	6.24416	1.85131	2.30456	1.39806
1986.54	9.12143	10.07	8.1729	9.20721	12.1504	6.26397	1.85671	2.3108	1.40262
1986.62	9.14309	10.0929	8.19333	9.23021	12.1768	6.28366	1.86207	2.317	1.40715
1986.71	9.16458	10.1156	8.21355	9.25301	12.2028	6.30321	1.86739	2.32314	1.41164
1986.79	9.18588	10.1382	8.23357	9.27561	12.2286	6.32263	1.87266	2.32923	1.41609
1986.87	9.20699	10.1606	8.25338	9.298	12.2541	6.34192	1.87789	2.33527	1.4205
1986.96	9.22791	10.1828	8.27298	9.32019	12.2793	6.36107	1.88307	2.34126	1.42488
1987.04	9.24864	10.2049	8.29236	9.34216	12.3042	6.38008	1.88821	2.3472	1.42922
1987.12	9.26917	10.2268	8.31153	9.36392	12.3289	6.39896	1.8933	2.35308	1.43351
1987.21	9.2895	10.2485	8.33048	9.38547	12.3532	6.4177	1.89834	2.3589	1.43777
1987.29	9.30962	10.27	8.3492	9.40681	12.3773	6.4363	1.90333	2.36467	1.44199
1987.37	9.32953	10.2914	8.36771	9.42792	12.4011	6.45476	1.90828	2.37038	1.44617
1987.46	9.34924	10.3125	8.38599	9.44881	12.4245	6.47307	1.91318	2.37604	1.45031
1987.54	9.36873	10.3334	8.40404	9.46948	12.4477	6.49124	1.91802	2.38163	1.45441
1987.62	9.38801	10.3542	8.42186	9.48991	12.4706	6.50927	1.92282	2.38717	1.45847
1987.71	9.40706	10.3747	8.43945	9.51012	12.4931	6.52715	1.92756	2.39264	1.46249
1987.79	9.42589	10.395	8.45681	9.5301	12.5153	6.54488	1.93226	2.39805	1.46646
1987.87	9.4445	10.4151	8.47393	9.54985	12.5372	6.56247	1.9369	2.4034	1.47039
1987.96	9.46288	10.4349	8.49081	9.56935	12.5588	6.5799	1.94149	2.40869	1.47428
1988.04	9.48102	10.4546	8.50746	9.58862	12.5801	6.59718	1.94602	2.41391	1.47813
1988.12	9.49893	10.474	8.52386	9.60765	12.601	6.61431	1.9505	2.41906	1.48194
1988.21	9.5166	10.4932	8.54001	9.62643	12.6216	6.63128	1.95492	2.42415	1.4857
1988.29	9.53403	10.5121	8.55592	9.64497	12.6418	6.6481	1.95929	2.42917	1.48942
1988.37	9.55121	10.5308	8.57159	9.66326	12.6618	6.66476	1.96361	2.43412	1.49309
1988.46	9.56814	10.5493	8.587	9.68129	12.6813	6.68127	1.96786	2.43901	1.49672
1988.54	9.58483	10.5675	8.60216	9.69908	12.7005	6.69761	1.97206	2.44382	1.5003
1988.62	9.60126	10.5854	8.61707	9.7166	12.7194	6.71379	1.9762	2.44857	1.50384
1988.71	9.61743	10.6031	8.63172	9.73387	12.7379	6.72981	1.98029	2.45324	1.50734
1988.79	9.63334	10.6206	8.64611	9.75088	12.7561	6.74566	1.98431	2.45783	1.51079
1988.87	9.64898	10.6377	8.66025	9.76762	12.7739	6.76135	1.98827	2.46236	1.51419
1988.96	9.66436	10.6546	8.67412	9.7841	12.7913	6.77687	1.99217	2.46681	1.51754
1989.04	9.67947	10.6712	8.68773	9.80031	12.8084	6.79223	1.99602	2.47118	1.52085
1989.12	9.69431	10.6875	8.70107	9.81625	12.8251	6.80741	1.9998	2.47548	1.52411
1989.21	9.70887	10.7036	8.71414	9.83192	12.8414	6.82242	2.00351	2.4797	1.52732
1989.29	9.72315	10.7193	8.72695	9.84731	12.8574	6.83726	2.00717	2.48384	1.53049
1989.37	9.73714	10.7348	8.73948	9.86243	12.8729	6.85192	2.01076	2.48791	1.5336
1989.46	9.75085	10.75	8.75174	9.87726	12.8881	6.86641	2.01428	2.49189	1.53667
1989.54	9.76427	10.7648	8.76373	9.89181	12.9029	6.88072	2.01774	2.49579	1.53969
1989.62	9.7774	10.7794	8.77544	9.90608	12.9173	6.89485	2.02114	2.49961	1.54266
1989.71	9.79024	10.7936	8.78687	9.92006	12.9313	6.9088	2.02447	2.50335	1.54558
1989.79	9.80277	10.8075	8.79802	9.93375	12.9449	6.92256	2.02773	2.50701	1.54845
1989.87	9.81501	10.8211	8.80889	9.94715	12.9582	6.93614	2.03092	2.51058	1.55127
1989.96	9.82694	10.8344	8.81947	9.96025	12.971	6.94953	2.03405	2.51406	1.55403
1990.04	9.83856	10.8473	8.82977	9.97306	12.9834	6.96274	2.03711	2.51746	1.55675
1990.12	9.84987	10.86	8.83978	9.98557	12.9954	6.97576	2.04009	2.52078	1.55941
1990.21	9.86087	10.8722	8.8495	9.99778	13.007	6.98858	2.04301	2.524	1.56202
1990.29	9.87155	10.8842	8.85893	10.0097	13.0181	7.00121	2.04586	2.52714	1.56458
1990.37	9.88191	10.8957	8.86807	10.0213	13.0289	7.01365	2.04864	2.53019	1.56709
1990.46	9.89195	10.907	8.87691	10.0326	13.0392	7.02589	2.05134	2.53315	1.56954
1990.54	9.90166	10.9179	8.88546	10.0435	13.0492	7.03793	2.05398	2.53602	1.57194
1990.62	9.91104	10.9284	8.8937	10.0542	13.0586	7.04977	2.05654	2.53879	1.57428
1990.71	9.92009	10.9385	8.90165	10.0646	13.0677	7.06141	2.05903	2.54148	1.57657
1990.79	9.92881	10.9483	8.9093	10.0746	13.0763	7.07284	2.06144	2.54407	1.57881
1990.87	9.93719	10.9577	8.91664	10.0843	13.0845	7.08407	2.06378	2.54656	1.58099
1990.96	9.94522	10.9668	8.92368	10.0937	13.0923	7.09509	2.06604	2.54897	1.58311
1991.04	9.95292	10.9754	8.93041	10.1028	13.0996	7.1059	2.06823	2.55127	1.58518
1991.12	9.96026	10.9837	8.93683	10.1115	13.1065	7.11649	2.07034	2.55348	1.58719
1991.21	9.96726	10.9916	8.94294	10.1199	13.1129	7.12688	2.07237	2.5556	1.58915
1991.29	9.9739	10.9991	8.94874	10.128	13.1189	7.13704	2.07433	2.55762	1.59104
1991.37	9.98019	11.0062	8.95422	10.1357	13.1245	7.14699	2.07621	2.55953	1.59288
1991.46	9.98612	11.0128	8.95939	10.1431	13.1296	7.15672	2.07801	2.56135	1.59467
1991.54	9.99169	11.0191	8.96425	10.1502	13.1342	7.16622	2.07973	2.56307	1.59639
1991.62	9.99689	11.025	8.96878	10.1569	13.1384	7.1755	2.08137	2.56469	1.59805
1991.71	10.0017	11.0305	8.973	10.1633	13.1421	7.18456	2.08293	2.56621	1.59966
1991.79	10.0062	11.0355	8.97689	10.1694	13.1454	7.19338	2.08441	2.56762	1.6012
1991.87	10.0103	11.0401	8.98046	10.1751	13.1482	7.20197	2.08581	2.56894	1.60269
1991.96	10.014	11.0443	8.9837	10.1804	13.1505	7.21033	2.08713	2.57015	1.60411
1992.04	10.0173	11.0481	8.98662	10.1854	13.1524	7.21846	2.08836	2.57125	1.60547
1992.12	10.0203	11.0514	8.98921	10.1901	13.1538	7.22634	2.08952	2.57226	1.60677
1992.21	10.0229	11.0543	8.99147	10.1944	13.1547	7.23398	2.09058	2.57315	1.60801
1992.29	10.0251	11.0567	8.9934	10.1983	13.1552	7.24139	2.09157	2.57395	1.60919
1992.37	10.0269	11.0587	8.99499	10.2019	13.1552	7.24854	2.09247	2.57463	1.6103
1992.46	10.0283	11.0603	8.99625	10.2051	13.1547	7.25545	2.09328	2.57521	1.61135
1992.54	10.0293	11.0614	8.99717	10.2079	13.1538	7.2621	2.09401	2.57568	1.61234
1992.62	10.0299	11.062	8.99776	10.2104	13.1523	7.26851	2.09465	2.57604	1.61327
1992.71	10.0301	11.0622	8.998	10.2125	13.1504	7.27465	2.09521	2.5763	1.61412
1992.79	10.0299	11.0619	8.99791	10.2143	13.148	7.28054	2.09568	2.57644	1.61492
1992.87	10.0293	11.0611	8.99747	10.2156	13.1451	7.28617	2.09606	2.57648	1.61565
1992.96	10.0283	11.0599	8.99669	10.2166	13.1418	7.29153	2.09636	2.57641	1.61631
1993.04	10.0269	11.0582	8.99556	10.2173	13.1379	7.29663	2.09656	2.57622	1.6169
1993.12	10.025	11.056	8.99409	10.2175	13.1336	7.30146	2.09668	2.57593	1.61743
1993.21	10.0228	11.0533	8.99226	10.2174	13.1288	7.30601	2.09671	2.57552	1.61789
1993.29	10.0201	11.0502	8.99009	10.2169	13.1234	7.31029	2.09664	2.575	1.61829
1993.37	10.0171	11.0465	8.98756	10.216	13.1176	7.3143	2.09649	2.57437	1.61861
1993.46	10.0135	11.0424	8.98469	10.2147	13.1114	7.31802	2.09625	2.57362	1.61887
1993.54	10.0096	11.0378	8.98145	10.213	13.1046	7.32146	2.09591	2.57276	1.61906
1993.62	10.0052	11.0326	8.97786	10.211	13.0973	7.32461	2.09549	2.57179	1.61918
1993.71	10.0005	11.027	8.97391	10.2085	13.0896	7.32746	2.09497	2.57071	1.61923
1993.79	9.99523	11.0209	8.96961	10.2057	13.0813	7.33003	2.09436	2.56951	1.6192
1993.87	9.98957	11.0142	8.96494	10.2024	13.0726	7.3323	2.09365	2.56819	1.61911
1993.96	9.98347	11.007	8.95991	10.1988	13.0633	7.33427	2.09285	2.56676	1.61895
1994.04	9.97693	10.9993	8.95451	10.1948	13.0536	7.33594	2.09196	2.56522	1.61871
1994.12	9.96994	10.9911	8.94876	10.1903	13.0434	7.3373	2.09098	2.56356	1.6184
1994.21	9.96252	10.9824	8.94263	10.1855	13.0326	7.33834	2.0899	2.56178	1.61802
1994.29	9.95464	10.9732	8.93613	10.1803	13.0214	7.33908	2.08872	2.55988	1.61756
1994.37	9.94632	10.9634	8.92927	10.1746	13.0097	7.3395	2.08745	2.55787	1.61703
1994.46	9.93755	10.9531	8.92203	10.1686	12.9975	7.3396	2.08609	2.55575	1.61642
1994.54	9.92832	10.9422	8.91443	10.1621	12.9848	7.33937	2.08462	2.5535	1.61574
1994.62	9.91864	10.9308	8.90644	10.1552	12.9717	7.33881	2.08307	2.55114	1.61499
1994.71	9.9085	10.9189	8.89808	10.148	12.958	7.33793	2.08141	2.54867	1.61415
1994.79	9.8979	10.9064	8.88935	10.1403	12.9438	7.3367	2.07966	2.54607	1.61325
1994.87	9.88684	10.8934	8.88023	10.1322	12.9292	7.33514	2.07781	2.54336	1.61226
1994.96	9.87531	10.8799	8.87074	10.1236	12.914	7.33323	2.07586	2.54053	1.6112
1995.04	9.86332	10.8658	8.86086	10.1147	12.8984	7.33098	2.07382	2.53758	1.61005
1995.12	9.85087	10.8511	8.8506	10.1053	12.8823	7.32837	2.07167	2.53451	1.60883
1995.21	9.83794	10.8359	8.83996	10.0956	12.8657	7.32541	2.06943	2.53133	1.60753
1995.29	9.82454	10.8202	8.82892	10.0854	12.8486	7.32208	2.06709	2.52802	1.60615
1995.37	9.81067	10.8038	8.8175	10.0747	12.8311	7.31839	2.06465	2.5246	1.60469
1995.46	9.79632	10.787	8.80569	10.0637	12.813	7.31433	2.06211	2.52107	1.60315
1995.54	9.7815	10.7695	8.79349	10.0522	12.7945	7.3099	2.05947	2.51741	1.60152
1995.62	9.7662	10.7515	8.78089	10.0403	12.7755	7.30509	2.05673	2.51364	1.59981
1995.71	9.75042	10.7329	8.7679	10.028	12.756	7.29989	2.05389	2.50975	1.59802
1995.79	9.73416	10.7138	8.75452	10.0152	12.7361	7.29431	2.05095	2.50574	1.59615
1995.87	9.71742	10.6941	8.74073	10.002	12.7157	7.28833	2.0479	2.50161	1.59419
1995.96	9.70019	10.6738	8.72655	9.98839	12.6948	7.28196	2.04476	2.49737	1.59215
1996.04	9.68247	10.653	8.71196	9.97433	12.6735	7.27518	2.04152	2.49301	1.59002
1996.12	9.66427	10.6316	8.69697	9.95984	12.6517	7.26799	2.03817	2.48854	1.58781
1996.21	9.64558	10.6096	8.68158	9.94491	12.6294	7.26039	2.03473	2.48394	1.58551
1996.29	9.62639	10.587	8.66578	9.92955	12.6067	7.25237	2.03118	2.47924	1.58312
1996.37	9.60672	10.5639	8.64956	9.91375	12.5836	7.24393	2.02753	2.47441	1.58064
1996.46	9.58655	10.5402	8.63294	9.89751	12.56	7.23506	2.02378	2.46947	1.57808
1996.54	9.56589	10.5159	8.61591	9.88083	12.5359	7.22576	2.01992	2.46442	1.57542
1996.62	9.54473	10.491	8.59845	9.86371	12.5114	7.21601	2.01596	2.45925	1.57268
1996.71	9.52308	10.4656	8.58058	9.84615	12.4865	7.20581	2.01191	2.45397	1.56985
1996.79	9.50092	10.4396	8.5623	9.82815	12.4611	7.19517	2.00774	2.44857	1.56692
1996.87	9.47827	10.413	8.54358	9.8097	12.4353	7.18406	2.00348	2.44306	1.5639
1996.96	9.45512	10.3858	8.52445	9.79081	12.4091	7.17249	1.99911	2.43744	1.56079
1997.04	9.43147	10.358	8.50489	9.77148	12.3825	7.16045	1.99464	2.4317	1.55758
1997.12	9.40731	10.3297	8.48489	9.7517	12.3555	7.14794	1.99007	2.42586	1.55429
1997.21	9.38265	10.3008	8.46447	9.73148	12.328	7.13494	1.9854	2.4199	1.55089
1997.29	9.35749	10.2714	8.44361	9.71082	12.3002	7.12145	1.98062	2.41383	1.5474
1997.37	9.33183	10.2413	8.42231	9.6897	12.2719	7.10747	1.97574	2.40766	1.54382
1997.46	9.30565	10.2107	8.40058	9.66814	12.2433	7.09298	1.97075	2.40137	1.54013
1997.54	9.27898	10.1796	8.3784	9.64613	12.2143	7.07798	1.96567	2.39498	1.53635
1997.62	9.25179	10.1478	8.35577	9.62368	12.1849	7.06247	1.96048	2.38848	1.53247
1997.71	9.2241	10.1155	8.33269	9.60078	12.1551	7.04643	1.95518	2.38188	1.52849
1997.79	9.1959	10.0826	8.30916	9.57743	12.125	7.02987	1.94979	2.37517	1.52441
1997.87	9.1672	10.0492	8.28517	9.55363	12.0945	7.01276	1.94429	2.36835	1.52023
1997.96	9.13798	10.0152	8.26072	9.52938	12.0636	6.99512	1.93869	2.36143	1.51594
1998.04	9.10825	9.9807	8.23581	9.50469	12.0325	6.97692	1.93298	2.35441	1.51156
1998.12	9.07802	9.94562	8.21042	9.47954	12.0009	6.95816	1.92718	2.34729	1.50706
1998.21	9.04728	9.90999	8.18457	9.45395	11.9691	6.93883	1.92127	2.34007	1.50247
1998.29	9.01602	9.87382	8.15823	9.42791	11.9369	6.91894	1.91526	2.33275	1.49777
1998.37	8.98426	9.83711	8.13142	9.40142	11.9044	6.89846	1.90914	2.32533	1.49296
1998.46	8.95199	9.79987	8.10411	9.37448	11.8716	6.87739	1.90293	2.31781	1.48805
1998.54	8.91921	9.7621	8.07632	9.3471	11.8385	6.85572	1.89661	2.3102	1.48302
1998.62	8.88592	9.72381	8.04802	9.31927	11.8051	6.83346	1.89019	2.3025	1.47789
1998.71	8.85211	9.68501	8.01922	9.29099	11.7714	6.81058	1.88367	2.2947	1.47265
1998.79	8.8178	9.64569	7.98991	9.26226	11.7374	6.78708	1.87705	2.28681	1.4673
1998.87	8.78299	9.60588	7.96009	9.23309	11.7032	6.76295	1.87033	2.27883	1.46183
1998.96	8.74766	9.56557	7.92975	9.20347	11.6688	6.73818	1.86351	2.27076	1.45625
1999.04	8.71182	9.52477	7.89887	9.1734	11.634	6.71278	1.85658	2.26261	1.45056
1999.12	8.67548	9.4835	7.86746	9.1429	11.5991	6.68672	1.84956	2.25436	1.44475
1999.21	8.63863	9.44175	7.83551	9.11194	11.5639	6.66	1.84244	2.24604	1.43883
1999.29	8.60127	9.39954	7.803	9.08055	11.5285	6.63262	1.83521	2.23763	1.43279
1999.37	8.56341	9.35688	7.76994	9.04871	11.4929	6.60456	1.82789	2.22915	1.42664
1999.46	8.52504	9.31377	7.73631	9.01643	11.457	6.57582	1.82047	2.22058	1.42036
1999.54	8.48617	9.27024	7.7021	8.98371	11.421	6.54639	1.81295	2.21194	1.41397
1999.62	8.4468	9.22628	7.66731	8.95056	11.3848	6.51626	1.80533	2.20322	1.40745
1999.71	8.40692	9.18192	7.63193	8.91696	11.3485	6.48543	1.79762	2.19442	1.40082
1999.79	8.36655	9.13716	7.59594	8.88293	11.312	6.45388	1.78981	2.18556	1.39406
1999.87	8.32567	9.09201	7.55934	8.84846	11.2753	6.42162	1.7819	2.17662	1.38717
1999.96	8.2843	9.04649	7.52211	8.81356	11.2385	6.38862	1.77389	2.16762	1.38017
2000.04	8.24243	9.00061	7.48425	8.77823	11.2016	6.35489	1.76579	2.15855	1.37303
2000.12	8.20006	8.95439	7.44574	8.74246	11.1645	6.32042	1.7576	2.14942	1.36578
2000.21	8.1572	8.90784	7.40657	8.70627	11.1273	6.2852	1.74931	2.14022	1.35839
2000.29	8.11385	8.86097	7.36673	8.66965	11.0901	6.24922	1.74092	2.13097	1.35087
2000.37	8.07001	8.81381	7.32622	8.6326	11.0527	6.21248	1.73244	2.12165	1.34323
2000.46	8.02568	8.76636	7.285	8.59513	11.0153	6.17497	1.72387	2.11228	1.33545
2000.54	7.98087	8.71865	7.24309	8.55724	10.9778	6.13669	1.7152	2.10286	1.32755
2000.62	7.93557	8.67068	7.20045	8.51893	10.9402	6.09763	1.70645	2.09339	1.31951
2000.71	7.88979	8.62249	7.15709	8.4802	10.9026	6.05777	1.6976	2.08386	1.31134
2000.79	7.84353	8.57407	7.11298	8.44105	10.865	6.01713	1.68866	2.07429	1.30303
2000.87	7.79679	8.52546	7.06811	8.4015	10.8273	5.97569	1.67963	2.06467	1.29459
2000.96	7.74957	8.47667	7.02248	8.36153	10.7896	5.93345	1.67052	2.05501	1.28602
2001.04	7.70189	8.42771	6.97606	8.32115	10.7519	5.8904	1.66131	2.04531	1.27731
2001.12	7.65373	8.37861	6.92885	8.28037	10.7142	5.84654	1.65202	2.03557	1.26846
2001.21	7.60511	8.32937	6.88084	8.23918	10.6765	5.80186	1.64264	2.0258	1.25947
2001.29	7.55602	8.28003	6.832	8.1976	10.6388	5.75637	1.63317	2.01599	1.25035
2001.37	7.50647	8.2306	6.78234	8.15562	10.6012	5.71006	1.62362	2.00615	1.24108
2001.46	7.45646	8.18109	6.73184	8.11324	10.5636	5.66292	1.61398	1.99628	1.23168
2001.54	7.406	8.13152	6.68048	8.07048	10.526	5.61495	1.60426	1.98638	1.22214
2001.62	7.35509	8.08191	6.62827	8.02732	10.4885	5.56615	1.59445	1.97646	1.21245
2001.71	7.30373	8.03227	6.57518	7.98378	10.451	5.51653	1.58457	1.96651	1.20263
2001.79	7.25192	7.98262	6.52122	7.93986	10.4137	5.46607	1.5746	1.95655	1.19266
2001.87	7.19967	7.93297	6.46637	7.89556	10.3763	5.41478	1.56455	1.94656	1.18255
2001.96	7.14699	7.88334	6.41064	7.85089	10.3391	5.36265	1.55443	1.93656	1.1723
2002.04	7.09387	7.83374	6.354	7.80585	10.302	5.3097	1.54422	1.92655	1.1619
2002.12	7.04032	7.78418	6.29646	7.76044	10.265	5.25591	1.53394	1.91652	1.15136
2002.21	6.98635	7.73468	6.23802	7.71467	10.228	5.20129	1.52358	1.90648	1.14068
2002.29	6.93196	7.68524	6.17868	7.66854	10.1912	5.14584	1.51315	1.89644	1.12986
2002.37	6.87715	7.63588	6.11842	7.62205	10.1545	5.08956	1.50264	1.88639	1.11889
2002.46	6.82193	7.5866	6.05725	7.57521	10.118	5.03245	1.49206	1.87634	1.10778
2002.54	6.7663	7.53742	5.99518	7.52803	10.0815	4.97452	1.48141	1.86628	1.09653
2002.62	6.71027	7.48833	5.93221	7.48051	10.0452	4.91578	1.47068	1.85623	1.08514
2002.71	6.65384	7.43935	5.86833	7.43265	10.0091	4.85621	1.45989	1.84618	1.0736
2002.79	6.59702	7.39048	5.80356	7.38445	9.97307	4.79584	1.44903	1.83613	1.06192
2002.87	6.53981	7.34173	5.73789	7.33593	9.93721	4.73466	1.4381	1.82609	1.0501
2002.96	6.48222	7.29309	5.67134	7.28709	9.9015	4.67268	1.4271	1.81606	1.03814
2003.04	6.42425	7.24458	5.60391	7.23793	9.86595	4.6099	1.41604	1.80604	1.02604
2003.12	6.36591	7.19619	5.53562	7.18845	9.83057	4.54633	1.40491	1.79602	1.0138
2003.21	6.3072	7.14793	5.46647	7.13867	9.79536	4.48198	1.39372	1.78603	1.00142
2003.29	6.24813	7.0998	5.39647	7.08858	9.76032	4.41685	1.38247	1.77604	0.988901
2003.37	6.18871	7.05179	5.32563	7.0382	9.72545	4.35095	1.37116	1.76607	0.976247
2003.46	6.12894	7.00391	5.25397	6.98752	9.69076	4.28429	1.35979	1.75612	0.963457
2003.54	6.06882	6.95616	5.18149	6.93656	9.65625	4.21687	1.34836	1.74619	0.950533
2003.62	6.00838	6.90854	5.10821	6.88532	9.62192	4.14871	1.33688	1.73628	0.937476
2003.71	5.9476	6.86104	5.03415	6.8338	9.58778	4.07982	1.32534	1.72639	0.924286
2003.79	5.88649	6.81366	4.95932	6.78201	9.55383	4.0102	1.31375	1.71653	0.910966
2003.87	5.82507	6.76641	4.88373	6.72996	9.52007	3.93986	1.3021	1.70669	0.897516
2003.96	5.76334	6.71928	4.8074	6.67766	9.4865	3.86881	1.29041	1.69687	0.883938
2004.04	5.70131	6.67226	4.73035	6.6251	9.45313	3.79707	1.27866	1.68708	0.870234
2004.12	5.63897	6.62537	4.65258	6.57229	9.41995	3.72464	1.26686	1.67732	0.856406
2004.21	5.57635	6.57859	4.57412	6.51925	9.38697	3.65153	1.25502	1.66759	0.842454
2004.29	5.51345	6.53191	4.49498	6.46597	9.35418	3.57777	1.24314	1.65789	0.828382
2004.37	5.45027	6.48535	4.41518	6.41247	9.3216	3.50334	1.23121	1.64822	0.81419
2004.46	5.38682	6.4389	4.33474	6.35875	9.28922	3.42828	1.21923	1.63858	0.799881
2004.54	5.32311	6.39255	4.25367	6.30482	9.25704	3.35259	1.20722	1.62898	0.785457
2004.62	5.25915	6.34631	4.17199	6.25067	9.22506	3.27628	1.19516	1.6194	0.770919
2004.71	5.19494	6.30016	4.08971	6.19633	9.19329	3.19937	1.18307	1.60987	0.75627
2004.79	5.13049	6.25412	4.00686	6.1418	9.16172	3.12187	1.17094	1.60036	0.741512
2004.87	5.06581	6.20817	3.92345	6.08708	9.13036	3.04379	1.15877	1.5909	0.726647
2004.96	5.00091	6.16232	3.83949	6.03217	9.0992	2.96514	1.14657	1.58147	0.711677
2005.04	4.93579	6.11656	3.75502	5.9771	9.06825	2.88595	1.13434	1.57207	0.696605
2005.12	4.87046	6.07089	3.67003	5.92186	9.0375	2.80621	1.12207	1.56271	0.681432
2005.21	4.80493	6.02532	3.58455	5.86645	9.00696	2.72595	1.10978	1.5534	0.666162
2005.29	4.73922	5.97983	3.4986	5.8109	8.97663	2.64517	1.09746	1.54411	0.650796
2005.37	4.67331	5.93443	3.4122	5.7552	8.9465	2.5639	1.0851	1.53487	0.635337
2005.46	4.60723	5.88911	3.32535	5.69936	8.91658	2.48214	1.07273	1.52567	0.619786
2005.54	4.54098	5.84388	3.23809	5.64339	8.88686	2.39991	1.06033	1.51651	0.604148
2005.62	4.47457	5.79873	3.15042	5.58729	8.85735	2.31722	1.0479	1.50738	0.588423
2005.71	4.40801	5.75367	3.06236	5.53107	8.82804	2.23409	1.03546	1.4983	0.572615
2005.79	4.34131	5.70869	2.97392	5.47474	8.79894	2.15053	1.02299	1.48926	0.556725
2005.87	4.27446	5.66378	2.88514	5.4183	8.77004	2.06656	1.0105	1.48025	0.540756
2005.96	4.20749	5.61896	2.79601	5.36177	8.74135	1.98218	0.998001	1.47129	0.524711
2006.04	4.14039	5.57422	2.70656	5.30514	8.71286	1.89741	0.985481	1.46237	0.508592
2006.12	4.07318	5.52955	2.61681	5.24842	8.68457	1.81227	0.972945	1.45349	0.4924
2006.21	4.00586	5.48496	2.52676	5.19162	8.65648	1.72676	0.960394	1.44465	0.47614
2006.29	3.93845	5.44045	2.43644	5.13475	8.62859	1.64091	0.947831	1.43585	0.459812
2006.37	3.87094	5.39602	2.34586	5.07781	8.6009	1.55472	0.935255	1.42709	0.443419
2006.46	3.80334	5.35166	2.25503	5.02081	8.57341	1.46821	0.922668	1.41837	0.426963
2006.54	3.73567	5.30737	2.16397	4.96375	8.54612	1.38138	0.910071	1.4097	0.410447
2006.62	3.66793	5.26316	2.0727	4.90664	8.51902	1.29426	0.897466	1.40106	0.393872
2006.71	3.60012	5.21901	1.98123	4.84948	8.49211	1.20685	0.884852	1.39246	0.377242
2006.79	3.53225	5.17494	1.88956	4.79228	8.46539	1.11917	0.872231	1.3839	0.360557
2006.87	3.46433	5.13095	1.79772	4.73504	8.43887	1.03122	0.859603	1.37539	0.343819
2006.96	3.39637	5.08702	1.70572	4.67778	8.41253	0.943026	0.84697	1.36691	0.327032
